# Supplementary material for: Screening of Lesser-Known Salted–Dried Fish Species for Fatty Acids, Tocols, and Squalene
Source: MDPI journal article supplement (doi:10.3390/foods12051083), 2023-03-03
Supplement: s1 [file s1]

# Manuscript: Screening of Lesser-Known Salted–Dried Fish Species for Fatty Acids, Tocols, and Squalene

Supplementary Table S2. Nutritional Indices for Fatty Acids

| Species                      | PUFA/SFA | n-6/n-3 PUFA ratio | EPA+DHA | AI                           | TI   | HH   | FLQ   |
|------------------------------|----------|--------------------|---------|------------------------------|------|------|-------|
| <b>Fillets</b>               |          |                    |         | <b>Family Carangidae</b>     |      |      |       |
| <i>S. leptolepis</i>         | 1.11     | 0.15               | 31.3    | 0.48                         | 0.29 | 2.28 | 32.33 |
| <i>S. quinqueradiata</i>     | 1.40     | 0.07               | 39.4    | 0.36                         | 0.21 | 3.12 | 40.41 |
|                              |          |                    |         | <b>Family: Clupeidae</b>     |      |      |       |
| <i>A. kessleri</i>           | 0.80     | 0.18               | 12.7    | 0.39                         | 0.28 | 2.82 | 13.42 |
| <i>C. cultriventris</i>      | 0.62     | 0.10               | 12.4    | 0.57                         | 0.31 | 2.27 | 12.46 |
|                              |          |                    |         | <b>Family Cyprinidae</b>     |      |      |       |
| <i>A. brama</i>              | 1.36     | 0.21               | 24.5    | 0.35                         | 0.20 | 3.46 | 25.31 |
| <i>A. mento</i>              | 0.99     | 0.13               | 16.8    | 0.61                         | 0.27 | 2.06 | 17.97 |
| <i>A. aspius</i>             | 0.36     | 0.26               | 8.8     | 0.62                         | 0.56 | 1.80 | 9.70  |
| <i>B. ballerus</i>           | 1.30     | 0.23               | 28.7    | 0.45                         | 0.26 | 2.41 | 29.47 |
| <i>B. bjoerkna</i>           | 0.68     | 0.23               | 13.6    | 0.55                         | 0.39 | 2.28 | 14.36 |
| <i>B. sapa</i>               | 1.16     | 0.33               | 26.2    | 0.45                         | 0.31 | 2.31 | 26.41 |
| <i>B. tauricus</i>           | 1.76     | 1.52               | 8.9     | 0.24                         | 0.23 | 4.85 | 9.92  |
| <i>C. auratus</i>            | 1.26     | 0.33               | 25.0    | 0.43                         | 0.28 | 2.29 | 27.90 |
| <i>C. carpio</i>             | 0.92     | 0.22               | 19.4    | 0.35                         | 0.30 | 3.03 | 20.86 |
| <i>H. molitrix</i>           | 0.58     | 0.38               | 12.5    | 0.73                         | 0.46 | 1.91 | 12.72 |
| <i>P. cultratus</i>          | 0.41     | 0.31               | 9.8     | 0.53                         | 0.57 | 2.00 | 10.01 |
| <i>R. caspicus</i>           | 1.30     | 0.14               | 28.8    | 0.41                         | 0.23 | 2.65 | 29.72 |
| <i>R. heckelii</i>           | 0.77     | 0.26               | 14.9    | 0.45                         | 0.34 | 2.27 | 15.11 |
| <i>S. erythrophthalmus</i>   | 1.14     | 0.73               | 15.0    | 0.46                         | 0.32 | 2.33 | 15.63 |
| <i>V. vimba</i>              | 1.19     | 0.29               | 19.0    | 0.39                         | 0.26 | 2.73 | 19.77 |
|                              |          |                    |         | <b>Family Gadidae</b>        |      |      |       |
| <i>G. chalcogrammus</i>      | 1.52     | 0.10               | 39.8    | 0.44                         | 0.20 | 2.35 | 39.84 |
| <i>G. morhua</i>             | 2.15     | 0.05               | 41.0    | 0.31                         | 0.13 | 3.76 | 41.88 |
|                              |          |                    |         | <b>Family Mullidae</b>       |      |      |       |
| <i>M. barbatus</i>           | 0.95     | 0.23               | 23.2    | 0.47                         | 0.32 | 2.80 | 23.53 |
|                              |          |                    |         | <b>Family Osmeridae</b>      |      |      |       |
| <i>O. mordax</i>             | 1.25     | 0.05               | 34.7    | 0.55                         | 0.20 | 2.35 | 34.91 |
| <i>S. lucioperca</i>         | 1.39     | 0.11               | 32.9    | 0.39                         | 0.21 | 2.76 | 34.16 |
|                              |          |                    |         | <b>Family Percidae</b>       |      |      |       |
| <i>P. fluviatilis</i>        | 1.42     | 0.11               | 34.4    | 0.39                         | 0.20 | 2.83 | 37.55 |
|                              |          |                    |         | <b>Family Pleuronectidae</b> |      |      |       |
| <i>P. quadrituberculatus</i> | 1.72     | 0.09               | 27.5    | 0.40                         | 0.15 | 3.20 | 29.13 |
|                              |          |                    |         | <b>Family Salmonidae</b>     |      |      |       |
| <i>O. gorbuscha</i>          | 1.05     | 0.06               | 22.4    | 0.52                         | 0.17 | 3.09 | 26.38 |
|                              |          |                    |         | <b>Family Siluridae</b>      |      |      |       |
| <i>P. asotus</i>             | 0.80     | 0.41               | 11.4    | 0.42                         | 0.37 | 2.54 | 11.89 |
| <b>Roes</b>                  |          |                    |         | <b>Family Cyprinidae</b>     |      |      |       |
| <i>A. brama</i>              | 1.08     | 0.16               | 26.9    | 0.46                         | 0.25 | 2.34 | 27.56 |
| <i>C. carpio</i>             | 1.03     | 0.33               | 17.1    | 0.41                         | 0.30 | 2.39 | 19.48 |
| <i>R. caspicus</i>           | 1.39     | 0.10               | 35.7    | 0.42                         | 0.21 | 2.45 | 36.35 |
| <i>S. erythrophthalmus</i>   | 1.12     | 0.28               |         | 0.47                         | 0.31 | 1.99 | 26.85 |
|                              |          |                    |         | <b>Family Moridae</b>        |      |      |       |
| <i>L. longipes</i>           | 0.84     | 0.28               | 16.6    | 0.45                         | 0.37 | 2.18 | 16.97 |
|                              |          |                    |         | <b>Family Osmeridae</b>      |      |      |       |
| <i>O. mordax</i>             | 1.17     | 0.07               | 26.9    | 0.61                         | 0.21 | 2.22 | 27.59 |
|                              |          |                    |         | <b>Family Pleuronectidae</b> |      |      |       |
| <i>P. quadrituberculatus</i> | 1.74     | 0.07               | 37.3    | 0.43                         | 0.16 | 2.84 | 42.10 |

**Abbreviations:** PUFA: polyunsaturated fatty acids; SFA: saturated fatty acids; AI: atherogenic index; TI: thrombogenic index; HH: hypocholesterolemic/hypercholesterolemic fatty acids ratio; FLQ: fish lipid quality.
