# Supplementary material for: Screening of Lesser-Known Salted–Dried Fish Species for Fatty Acids, Tocols, and Squalene
Source: MDPI journal article supplement (doi:10.3390/foods12051083), 2023-03-03
Supplement: s1 [file s1]

# Manuscript: Screening of Lesser-Known Salted–Dried Fish Species for Fatty Acids, Tocols, and Squalene

Supplementary Table S1. Fatty acids groups and ratios of salted-dried fish

|                              | $\Sigma$ SFA | $\Sigma$ MUFA | $\Sigma$ PUFA | $\Sigma$ <i>n</i> -6 PUFA    | $\Sigma$ <i>n</i> -3 PUFA | $\Sigma$ EPA+DHA | DHA/EPA |
|------------------------------|--------------|---------------|---------------|------------------------------|---------------------------|------------------|---------|
| <b>Fillets</b>               |              |               |               |                              |                           |                  |         |
| <i>A. kessleri</i>           | 24.4         | 49.0          | 19.6          | 3.0                          | 16.6                      | 12.7             | 1.35    |
| <i>C. cultriventris</i>      | 31.3         | 49.3          | 19.4          | 1.8                          | 17.6                      | 12.4             | 2.54    |
|                              |              |               |               | <b>Family Cyprinidae</b>     |                           |                  |         |
| <i>A. brama</i>              | 26.2         | 33.9          | 35.7          | 6.1                          | 29.6                      | 24.5             | 1.69    |
| <i>A. mento</i>              | 31.3         | 31.9          | 31.0          | 3.5                          | 27.5                      | 16.8             | 1.63    |
| <i>A. aspius</i>             | 36.9         | 40.6          | 13.1          | 2.7                          | 10.4                      | 8.8              | 4.18    |
| <i>B. ballerus</i>           | 32.1         | 23.5          | 41.8          | 7.8                          | 34.0                      | 28.7             | 2.26    |
| <i>B. sapa</i>               | 35.8         | 21.9          | 41.5          | 10.4                         | 31.1                      | 26.2             | 2.01    |
| <i>B. tauricus</i>           | 21.1         | 31.1          | 37.1          | 22.4                         | 14.7                      | 8.9              | 2.18    |
| <i>B. bjoerkna</i>           | 32.9         | 37.5          | 22.3          | 4.1                          | 18.2                      | 13.6             | 1.34    |
| <i>C. auratus</i>            | 30.2         | 22.4          | 38.2          | 9.4                          | 28.8                      | 25.0             | 2.68    |
| <i>C. carpio</i>             | 35.7         | 23.7          | 33.0          | 5.9                          | 27.1                      | 19.4             | 1.52    |
| <i>H. molitrix</i>           | 39.6         | 38.7          | 23.0          | 6.3                          | 16.7                      | 12.5             | 1.40    |
| <i>P. cultratus</i>          | 38.2         | 42.8          | 15.8          | 3.7                          | 12.1                      | 9.8              | 3.67    |
| <i>R. caspicus</i>           | 28.5         | 29.9          | 37.1          | 4.6                          | 32.5                      | 28.8             | 1.97    |
| <i>R. heckelii</i>           | 31.0         | 45.1          | 23.8          | 4.9                          | 18.9                      | 14.9             | 1.10    |
| <i>S. erythrophthalmus</i>   | 33.3         | 24.9          | 37.8          | 16.0                         | 21.8                      | 15.0             | 2.57    |
| <i>V. vimba</i>              | 28.9         | 32.1          | 34.5          | 7.7                          | 26.8                      | 19.0             | 2.06    |
|                              |              |               |               | <b>Family Gadidae</b>        |                           |                  |         |
| <i>G. chalcogrammus</i>      | 31.6         | 20.2          | 48.1          | 4.2                          | 43.9                      | 39.8             | 3.80    |
| <i>G. morhua</i>             | 20.6         | 33.0          | 44.3          | 2.1                          | 42.2                      | 41.0             | 1.29    |
|                              |              |               |               | <b>Family Percidae</b>       |                           |                  |         |
| <i>P. fluviatilis</i>        | 33.3         | 12.6          | 47.3          | 4.8                          | 42.5                      | 34.4             | 8.05    |
|                              |              |               |               | <b>Family Osmeridae</b>      |                           |                  |         |
| <i>O. mordax</i>             | 31.2         | 28.4          | 39.1          | 1.7                          | 37.4                      | 34.7             | 1.84    |
| <i>S. lucioperca</i>         | 29.3         | 26.1          | 40.8          | 3.9                          | 36.9                      | 32.9             | 5.45    |
|                              |              |               |               | <b>Family Carangidae</b>     |                           |                  |         |
| <i>S. leptolepis</i>         | 38.7         | 15.1          | 43.0          | 5.7                          | 37.3                      | 31.3             | 4.22    |
| <i>S. quinqueriata</i>       | 35.5         | 12.3          | 49.7          | 3.2                          | 46.5                      | 39.4             | 6.88    |
|                              |              |               |               | <b>Family Mullidae</b>       |                           |                  |         |
| <i>M. barbatus</i>           | 35.4         | 29.6          | 33.6          | 6.3                          | 27.3                      | 23.2             | 5.82    |
|                              |              |               |               | <b>Family Pleuronectidae</b> |                           |                  |         |
| <i>P. quadrituberculatus</i> | 20.9         | 37.0          | 35.9          | 3.0                          | 32.9                      | 27.5             | 0.29    |
|                              |              |               |               | <b>Family Salmonidae</b>     |                           |                  |         |
| <i>O. gorbuscha</i>          | 30.5         | 22.3          | 32.1          | 1.9                          | 30.2                      | 22.4             | 1.95    |
|                              |              |               |               | <b>Family Siluridae</b>      |                           |                  |         |
| <i>P. asotus</i>             | 32.2         | 37.2          | 25.9          | 7.5                          | 18.4                      | 11.4             | 1.59    |
| <b>Roes</b>                  |              |               |               | <b>Family Cyprinidae</b>     |                           |                  |         |
| <i>A. brama</i>              | 34.0         | 27.2          | 36.8          | 5.1                          | 31.7                      | 26.9             | 2.79    |
| <i>C. carpio</i>             | 29.6         | 29.2          | 30.5          | 7.5                          | 23.0                      | 17.1             | 3.07    |
| <i>R. caspicus</i>           | 32.2         | 21.2          | 44.8          | 4.0                          | 40.8                      | 35.7             | 1.73    |
| <i>S. erythrophthalmus</i>   | 33.3         | 24.9          | 37.8          | 16.0                         | 21.8                      |                  | 2.57    |
|                              |              |               |               |                              |                           | 15.0             |         |
|                              |              |               |               | <b>Family Moridae</b>        |                           |                  |         |
| <i>L. longipes</i>           | 34.9         | 33.5          | 29.4          | 6.5                          | 22.9                      | 16.6             | 3.05    |
|                              |              |               |               | <b>Family Osmeridae</b>      |                           |                  |         |
| <i>O. mordax</i>             | 27.9         | 36.9          | 32.7          | 2.0                          | 30.7                      | 26.9             | 0.64    |
|                              |              |               |               | <b>Family Pleuronectidae</b> |                           |                  |         |
| <i>P. quadrituberculatus</i> | 26.4         | 15.8          | 46.0          | 3.0                          | 43.0                      | 37.3             | 0.98    |
